# Supplementary material for: Mechanical synthesis of chemically bonded phosphorus–graphene hybrid as high-temperature lubricating oil additive
Source: Royal Society of Chemistry journal article supplement (doi:10.1039/c7ra11691h), 2018-01-01
Supplement: c7ra11691h1.pdf [file c7ra11691h1.pdf]

## Electronic Supplementary Information

### Mechanical synthesis of chemically bonded phosphorus-graphene hybrid as high-temperature lubricating oil additive

X. H. Wu, K. L. Gong, G. Q. Zhao, W. J. Lou, X. B. Wang, and W. M. Liu

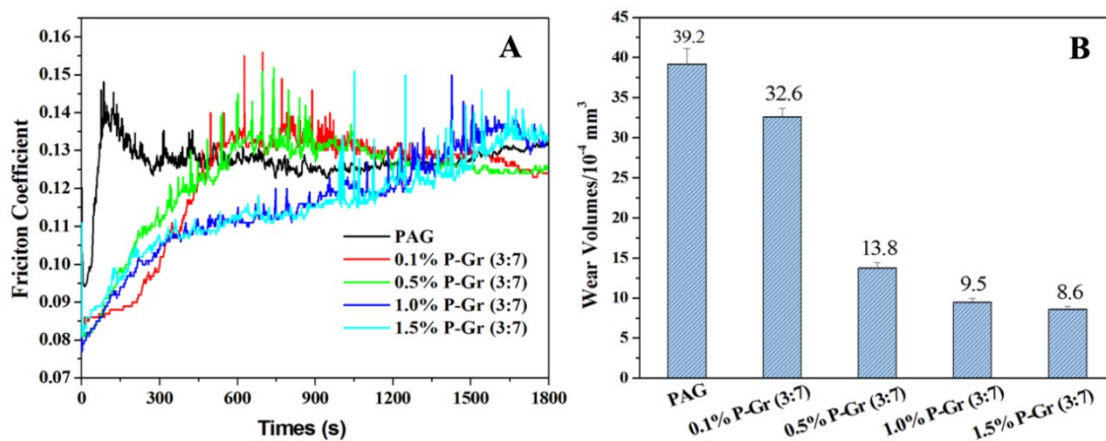

**Fig. S1.** (A) Friction coefficient and (B) Wear volumes of the discs lubricated by PAG and PAG containing different contents of P-Gr (3:7) at 100 °C (SRV load, 100 N; duration, 30 min; stroke, 1 mm; frequency, 25 Hz).

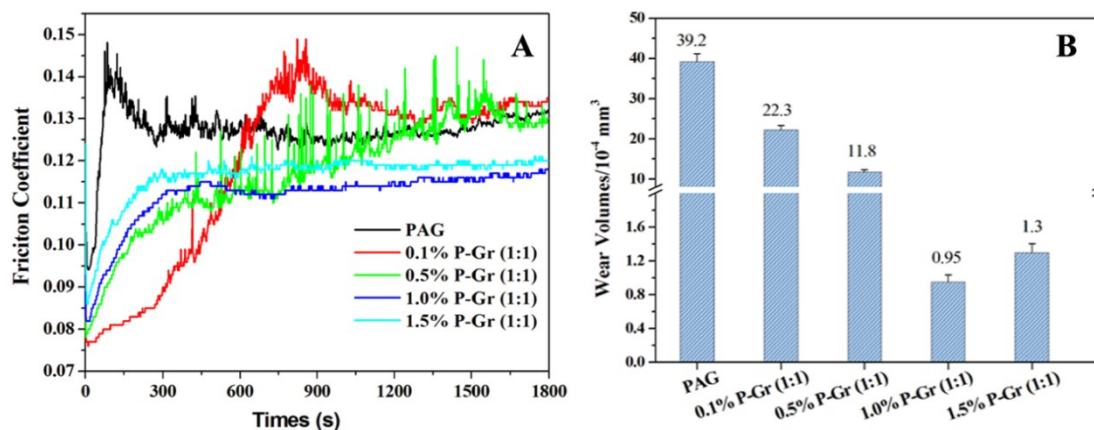

**Fig. S2.** (A) Friction coefficient and (B) Wear volumes of the discs lubricated by PAG and PAG containing different contents of P-Gr (1:1) at 100 °C (SRV load, 100 N; duration, 30 min; stroke, 1 mm; frequency, 25 Hz).

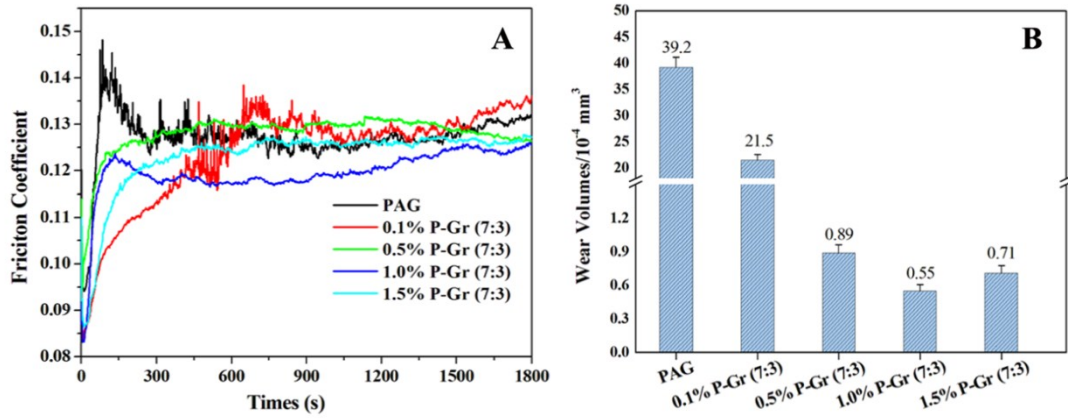

**Fig. S3.** (A) Friction coefficient and (B) Wear volumes of the discs lubricated by PAG and PAG containing different contents of P-Gr (7:3) at 100 °C (SRV load, 100 N; duration, 30 min; stroke, 1 mm; frequency, 25 Hz).
